# Supplementary material
Source: Springer Nature journal article supplement (https://www.springermedizin.de/resource/supplementary/12937_2010_310_MOESM6_ESM.pdf/25654842)
Supplement: MOESM6 [file 25654842]

**Table 6. Safety of Immunomodulatory Polysaccharide Products Following Oral Intake**

| Category         | Source                                             | Test group                          | Test                            | Design                                         | Results                                                                                                                                                      | Equivalent human dose* | Reference |
|------------------|----------------------------------------------------|-------------------------------------|---------------------------------|------------------------------------------------|--------------------------------------------------------------------------------------------------------------------------------------------------------------|------------------------|-----------|
| Arabinogalactans | <i>Argemone mexicana</i> (arabinogalactan protein) | Pregnant rats                       | Developmental toxicity          | 250, 500, or 1,00 mg/kg, gestational days 5-19 | No developmental toxicity: NOAEL = 1 g/kg                                                                                                                    | 68 g                   | [151]     |
|                  |                                                    | ♀ and ♂ rats                        | Fertility                       | 250, 500, or 1,00 mg/kg, 1 month               | No effects on reproduction: NOAEL = 1 g/kg                                                                                                                   |                        |           |
| Fucoidans        | <i>Undaria pinnatifida</i>                         | Rats                                | Subchronic toxicity             | 1.35 g/kg, 1 month                             | No evidence of toxicity                                                                                                                                      | 91.8 g                 | [152]     |
| Galactomannans   | <i>Cyamopsis tetragonolobus</i>                    | Adolescent and adult ♂ rats         | Subchronic and chronic toxicity | 8% of diet, 6-67 weeks                         | No evidence of toxicity                                                                                                                                      | 8% of diet             | [153]     |
|                  |                                                    | Rats                                | Acute toxicity                  | One 7.06 g/kg dose: observed 2 weeks           | LD <sub>50</sub> = 7.06 g/kg                                                                                                                                 | 480 g                  | [96]      |
|                  |                                                    |                                     | Subchronic and chronic toxicity | 1, 2, 4, 7.5 or 15% of diet, 3 months          | All doses ↓ ♀ BW; 7.5-15% ↓ ♂ BW; 15% ↓ bone marrow cellularity; ↓ kidney and liver weights                                                                  | 1-15% of diet          |           |
|                  |                                                    | 19 adults with hypercholesterolemia |                                 | 18 g/day, 1 year                               | Short-term gastric bloating/loose stools, in 8 subjects, resolved in 7-10 days; 2 withdrew because of diarrhea. No toxicity for 13 subjects completing study | 18 g                   | [154]     |
|                  |                                                    | 16 Type II diabetics                |                                 | 26.4-39.6 g/day, 6 months                      | No effects on hematologic, hepatic, or renal function                                                                                                        | 39.9 g                 | [155]     |
|                  |                                                    | 18 Type II diabetics                |                                 | 30 g/day, 4 months                             |                                                                                                                                                              | 30 g                   |           |
|                  |                                                    | Mice & rats                         | Acute toxicity                  | One 6 g/kg dose; observed 2 weeks              | LD <sub>50</sub> > 6 g/kg                                                                                                                                    | >408 g                 | [156]     |
|                  |                                                    | Rats                                | Subchronic toxicity             | 0.2, 1.0 or 5% of diet, 13 weeks               | No evidence of toxicity                                                                                                                                      | 5 % of diet            |           |
|                  |                                                    | 0.5 or 2.5 g/kg, 1 month            | NOAEL > 2.5 g/kg                | >170 g                                         | [157]                                                                                                                                                        |                        |           |
|                  | <i>S. typhimurium</i>                              |                                     | Mutagenicity                    | Ames test                                      | Not mutagenic                                                                                                                                                | NA                     |           |
| Glucans          | <i>Agaricus subrufescens</i>                       | Rats                                | Subchronic toxicity             | 0.63, 1.25, 2.5 or 5% of diet, 3 months        | NOAEL = 5% of diet                                                                                                                                           | 5% of diet             | [158]     |

|               |                                                            |                                                    |                                 |                                                                                           |                                                                                                                |             |       |
|---------------|------------------------------------------------------------|----------------------------------------------------|---------------------------------|-------------------------------------------------------------------------------------------|----------------------------------------------------------------------------------------------------------------|-------------|-------|
|               | (aqueous extract)                                          | 3 women with advanced cancers                      | Case reports                    | Specific identity of products, doses, and durations of intake unknown                     | Severe hepatotoxicity; two patients died                                                                       | NA          | [97]  |
|               | <i>Agaricus subrufescens</i> (freeze dried powder)         | 24 normal adults and 24 adults with liver problems | Subchronic toxicity             | 3 g, 4 months                                                                             | No evidence of toxicity                                                                                        | 3 g         | [159] |
|               | <i>Ganoderma lucidum</i> (supplement)                      | Elderly woman                                      | Case report                     | 1 year <i>G. lucidum</i> (and another unidentified product, initiated one month previous) | Elevated liver enzymes and liver tissue damage                                                                 | NA          | [98]  |
|               | <i>Grifola frondosa</i> (powder)                           | Rats                                               | Acute toxicity                  | One 2 g/kg dose                                                                           | No evidence of toxicity                                                                                        | 136 g       | [160] |
|               | <i>Lentinula edodes</i> (powder)                           | 10 adults                                          | Safety                          | 4 g/day for 10 weeks; repeated 3-6 months later                                           | 50% of subjects experienced blood eosinophilia, ↑ eosinophil granule proteins in serum and stool, ↑GI symptoms | 4 g         | [99]  |
|               | <i>Lentinula edodes</i> (SME)                              | Nude mice                                          | Safety                          | 10% of diet days 1-18, 33-50                                                              | No adverse events                                                                                              | 10% of diet | [80]  |
|               |                                                            | 61 men with prostate cancer                        |                                 | 0.1 g/kg, 6 months                                                                        | No adverse events                                                                                              | 6.8 g       |       |
|               | <i>Lentinus lepideus</i> (PG101)                           | Female mice                                        | Subchronic toxicity             | 0.5 g/kg, 24 days                                                                         | No evidence of toxicity                                                                                        | 34 g        | [92]  |
|               | <i>Phellinus linteus</i> (crude extract)                   | Rats                                               | Acute toxicity                  | One 5 g/kg dose; observed 2 weeks                                                         | LD <sub>50</sub> > 5 g/kg                                                                                      | 349 g       | [161] |
|               | <i>Pleurotus ostreatus</i> (aqueous extract)               | Mice                                               | Acute toxicity                  | One 3 g/kg dose; observed 1 day                                                           | LD <sub>50</sub> > 3 g/kg                                                                                      | >204.g      | [100] |
|               |                                                            |                                                    | Subacute toxicity               | 319 mg/kg, 1 month                                                                        | Hemorrhages in intestine, liver, lung, kidney; inflammation and microabscesses in liver                        | 21.7 g      |       |
|               | <i>Saccharomyces cerevisiae</i> (particulate glucan [WGP]) | Rats                                               | Acute toxicity                  | One 2 g/kg, observed 2 weeks                                                              | LD <sub>50</sub> > 2 g/kg                                                                                      | >136 g      | [144] |
|               |                                                            |                                                    | Subchronic toxicity             | 2, 33.3 or 100 mg/kg, 3 months                                                            | NOAEL = 100 mg/kg                                                                                              | 6.80 g      |       |
| Heteroglycans | <i>Trametes versicolor</i> (PSP)                           | Rats                                               | Subchronic toxicity             | 1.5, 3.0 or 6.0 mg/kg, 2 months                                                           | No evidence of toxicity                                                                                        | 408 mg      | [162] |
|               |                                                            | Rats & monkeys                                     | Subchronic and chronic toxicity | 100-200X equivalent human dose, 6 months                                                  | No evidence of toxicity                                                                                        | NA          |       |

|         |                                     |                               |                |                                   |                               |          |                                   |
|---------|-------------------------------------|-------------------------------|----------------|-----------------------------------|-------------------------------|----------|-----------------------------------|
|         | <i>Trametes versicolor</i><br>(PSK) | Humans with colon cancer      | Safety         | 3 g/day, up to 7 years            | No significant adverse events | 3 g      | [57]                              |
|         |                                     | Humans with colorectal cancer |                | 3 g/day, 2 years                  |                               | 3 g      | [58]                              |
| Mannans | <i>Aloe vera</i> gel                | Dogs                          | Acute toxicity | Fed one 32 g/kg; observed 2 weeks | LD50 > 32 g/kg                | >2,176 g | Bill Pine, personal communication |
|         |                                     | Rats                          |                | One 21.5 g/kg; observed 2 weeks   | LD50 > 10 g/kg                | >680 g   |                                   |

\*150 lb adult
